# Supplementary material
Source: MDPI journal article supplement (https://www.mdpi.com/2076-3417/11/14/6648)

# Supplementary Materials: Gaze Behavior and Positioning of Referee Teams during Three-Point Shots in Basketball

Stefanie Klatt, Benjamin Noël, André Nicklas, Karsten Schul, Florian Seifriz, Alessa Schwarting and Frowin Fasold

## 1. Supplementary Information

**Table S1.** Numbers of three-point shots separated by distance to the ball and role, means of coverage the primary visual field, and corresponding standard deviations.

|                    | Distance to the ball | Role   | Phase 1 | Phase 2 | Phase 3 |
|--------------------|----------------------|--------|---------|---------|---------|
| N                  | nearby               | Lead   | 18      | 18      | 18      |
|                    |                      | Center | 25      | 25      | 25      |
|                    |                      | Trail  | 35      | 35      | 35      |
|                    | far away             | Lead   | 42      | 42      | 42      |
|                    |                      | Center | 38      | 38      | 38      |
|                    |                      | Trail  | 25      | 25      | 25      |
| Mean               | nearby               | Lead   | 0.767   | 0.834   | 0.728   |
|                    |                      | Center | 0.957   | 0.947   | 0.926   |
|                    |                      | Trail  | 1.00    | 0.932   | 0.809   |
|                    | far away             | Lead   | 0.482   | 0.742   | 0.774   |
|                    |                      | Center | 0.260   | 0.548   | 0.504   |
|                    |                      | Trail  | 0.284   | 0.419   | 0.334   |
| Standard deviation | nearby               | Lead   | 0.344   | 0.206   | 0.433   |
|                    |                      | Center | 0.153   | 0.111   | 0.227   |
|                    |                      | Trail  | 0.00    | 0.161   | 0.381   |
|                    | far away             | Lead   | 0.449   | 0.327   | 0.375   |
|                    |                      | Center | 0.389   | 0.303   | 0.413   |
|                    |                      | Trail  | 0.430   | 0.330   | 0.422   |

**Figure S1.** Frequency distribution of the coverage of the primary areas of responsibility in percent as a function of role, time, and relation to the ball.

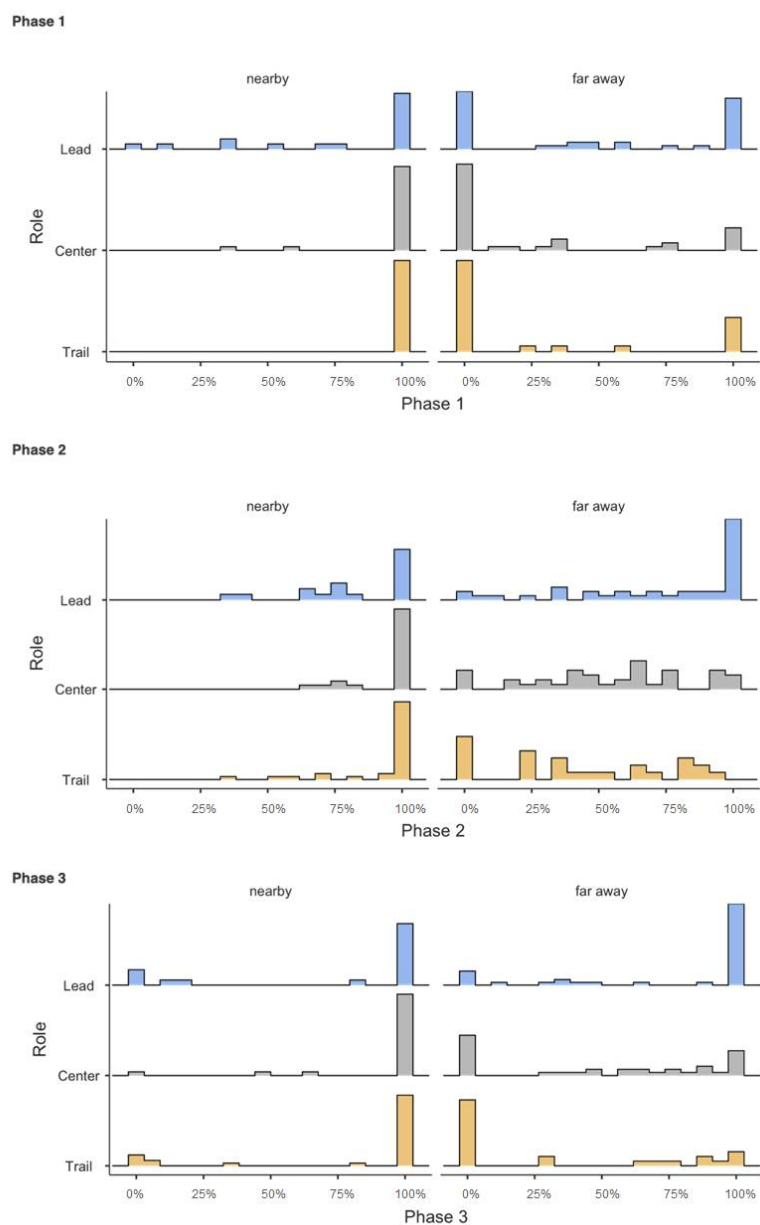

Supplement: s1 [file s1]
